# Supplementary material
Source: MDPI journal article supplement (https://www.mdpi.com/1999-4907/13/1/114)
Supplement: s1 [file s1]

Table S1 Differentially expressed genes in metabolic pathway Ko00564

|   | sequence ID             | accession No.    | symbol    | description                                          | e-value | Fold change (log2FC) |
|---|-------------------------|------------------|-----------|------------------------------------------------------|---------|----------------------|
| 1 | BUX.gene.s0114<br>2.44  | CAD52338<br>08.1 | PCYT1     | unnamed protein product [Bursaphelenchus xylophilus] | 0       | 9.4984               |
| 2 | BUX.gene.s0046<br>0.338 | CAD52137<br>22.1 | PLPP1     | unnamed protein product [Bursaphelenchus xylophilus] | 0       | 2.6906               |
| 3 | BUX.gene.s0017<br>4.1   | CAD52335<br>24.1 | LPGAT1    | unnamed protein product [Bursaphelenchus xylophilus] | 0       | 1.3431               |
| 4 | BUX.gene.s0107<br>8.138 | CAD52097<br>04.1 | LYPLA2    | unnamed protein product [Bursaphelenchus xylophilus] | 2e-163  | 1.2766               |
| 5 | BUX.gene.s0046<br>0.52  | CAD52142<br>53.1 | PLPP2_    | unnamed protein product [Bursaphelenchus xylophilus] | 0       | 1.1320               |
| 6 | BUX.gene.s0020<br>6.10  | CAD52120<br>56.1 | EPT1      | unnamed protein product [Bursaphelenchus xylophilus] | 1e-84   | 1.0983               |
|   |                         |                  |           |                                                      |         |                      |
| 7 | BUX.gene.s0042<br>2.586 | CAD52208<br>87.1 | dgkA, DGK | unnamed protein product [Bursaphelenchus xylophilus] | 0       | -1.0124              |
| 8 | BUX.gene.s0042<br>2.572 | CAD52209<br>15.1 | PCYT2     | unnamed protein                                      | 0       | -1.4523              |

|        |                         |                  |            |                                                                      |            |         |
|--------|-------------------------|------------------|------------|----------------------------------------------------------------------|------------|---------|
|        |                         |                  |            | product<br>[Bursaphelen<br>chus<br>xylophilus]                       |            |         |
| 9      | BUX.gene.s0042<br>2.660 | CAD52207<br>53.1 | CHK        | unnamed<br>protein<br>product<br>[Bursaphelen<br>chus<br>xylophilus] | 0.0        | -1.5563 |
| 1<br>0 | BUX.gene.s0039<br>7.142 | CAD52123<br>50.1 | LYPL<br>A3 | unnamed<br>protein<br>product<br>[Bursaphelen<br>chus<br>xylophilus] | 1e-<br>145 | -7.9153 |
