# Supplementary material
Source: MDPI journal article supplement (https://www.mdpi.com/1999-4907/13/1/114)
Supplement: s1 [file s1]

**choline-phosphate cytidylyltransferase gene (*pcyt-1*)**

ATGTCGTCCCGCCAACTACGCAAACGTCAGACCGCGGCCAACAAATTCGAGCCCTCCGGGA  
AAGAAACGGGCCCCAATCGAATCGAAGTCTCCAACCTTCGGAGAGGTCGGAAATTGAGAA  
CGGATCAGAGTTAAGACTAGCACTGAACAAACCAGCACCCCTATAGCGATGAGCCTGATGC  
TATAAATGAGAGGAATCGAGTGGATTACAGTAAAAAATCACCTTGGAAGAGGCCTACA  
ACAACTCAGCCGGCCGACCAGTCCGAGTATTTGCTGATGGAATCTACGACTTGTTCCATCA  
TGGACACGCGAATCAGTTGAGACAAGCCAAAAATGCCTTCCCGAATGTCTACTTGATCGT  
TGGAGTCTGTGGCGACAAAAACACCCACAAATTCAAGGGGCGCACAGTGACCGAAGAAG  
ACGAGCGGTTCTGAAGCCGTCCGCCATTGCAGATATGTGGACGAAGTTTATAGGGACTCAC  
CATGGTATGTGACCGTCGATTTCTCAAAGAATTGAAGGTGGACTTTATCGCTCATGACGC  
CATACCGTACCTAGCCCCAGGCGAAGAAGATTTGTACGAAAAATTCAGACGGGAGGGAAT  
GTTTGTGGAAACGCAGCGAACGGAAGGCGTTTCTACGTCGGATGTGGTCTGCAGAATCAT  
CAGAGACTATGACAAGTATGTGAGAAGGAACCTACAGAGAGGATACTCCGCCAAGGAAC  
TCAATGTCGGATTCTTTTCGGCCCAACGATACCAACTCCAAAACCAAGTGGACAGTCTGA  
AACAAAAGGGAGCCGAACCTCCTAAACAGTTGGAGAACCCGCTCCGACGACTTTGTTAGAG  
GCTTCTTAGAGACCTTCCACAAAGATGGCCACATTACCCTGAACCTTGGCTCCAAACTCCG  
AGAATTGGTGAGCAGATCCCCATCCCCGGCCATTGAAGACGGATCGGCGGACGACGAAG  
AGAAAAATGACAACATCAAGACTTCAAAAGTTATCTAA
